# Supplementary material for: Ultrahigh mechanical flexibility induced superior piezoelectricity of InSeBr-type 2D Janus materials
Source: Royal Society of Chemistry journal article supplement (doi:10.1039/d2cp00918h), 2022-01-01
Supplement: d2cp00918h1.pdf [file d2cp00918h1.pdf]

## *Electronic Supplementary Information*

### **Ultrahigh mechanical flexibility induced superior piezoelectricity of InSeBr-type 2D Janus materials**

Xiaobo Shi,<sup>ab</sup> Shujuan Jiang,<sup>ac</sup> Xianwei Han,<sup>\*a</sup> Min Wei,<sup>d</sup> Bing Wang,<sup>a</sup> Gaofeng Zhao,<sup>\*a</sup>  
Guang-Ping Zheng<sup>\*c</sup> and Huabing Yin<sup>\*a</sup>

*<sup>a</sup>Institute for Computational Materials Science, International Joint Research Laboratory of  
New Energy Materials and Devices of Henan Province, School of Physics and Electronics,  
Henan University, Kaifeng 475004, China*

*<sup>b</sup>Institute of Artificial Intelligence, Henan Finance University, Zhengzhou 450046, China.*

*<sup>c</sup>Department of Mechanical Engineering, The Hong Kong Polytechnic University, Hung Hom,  
Kowloon, Hong Kong 999077, China*

*<sup>d</sup>Department of Physics and Electronic Engineering, Jinzhong University, Jinzhong 030619,  
China*

E-mails: xianweihan@henu.edu.cn, 10110094@vip.henu.edu.cn, mmzheng@polyu.edu.hk,  
and yhb@henu.edu.cn

**Table S1.** The optimized lattice constants of bulk InSeBr-type materials calculated by different vdW correction methods, including D2 method of Grimme (DFT-D2),<sup>1</sup> zero damping D3 method of Grimme (DFT-D3),<sup>2</sup> D3 method of Grimme with Becke-Jonson damping (DFT-D3+BJ),<sup>3</sup> Tkatchenko-Scheffler method (DFT-TS).<sup>4</sup> And the corresponding experiment data are also listed for comparison as well. DFT-D2 method can effectively reproduce the experiment data.

| Material | DFT-D2                 | DFT-D3                 | DFT-D3+BJ              | DFT-TS                 | Exp. <sup>5,6</sup>    |
|----------|------------------------|------------------------|------------------------|------------------------|------------------------|
| InSCl    | a=3.76 Å,<br>c=17.91 Å | a=3.82 Å,<br>c=17.81 Å | a=3.80 Å,<br>c=17.70 Å | a=3.84 Å,<br>c=17.98 Å | a=3.72 Å,<br>c=17.95 Å |
| InSBr    | a=3.81 Å,<br>c=18.51 Å | a=3.86 Å,<br>c=18.53 Å | a=3.85 Å,<br>c=18.46 Å | a=3.89 Å,<br>c=18.82 Å | a=3.83 Å,<br>c=18.75 Å |
| InSeCl   | a=3.88 Å,<br>c=18.18 Å | a=3.94 Å,<br>c=18.12 Å | a=3.92 Å,<br>c=18.09 Å | a=3.97 Å,<br>c=18.38 Å | a=3.85 Å,<br>c=18.44 Å |
| InSeBr   | a=3.92 Å,<br>c=18.94 Å | a=3.98 Å,<br>c=18.92 Å | a=3.96 Å,<br>c=18.84 Å | a=4.01 Å,<br>c=19.25 Å | a=3.92 Å,<br>c=19.01 Å |

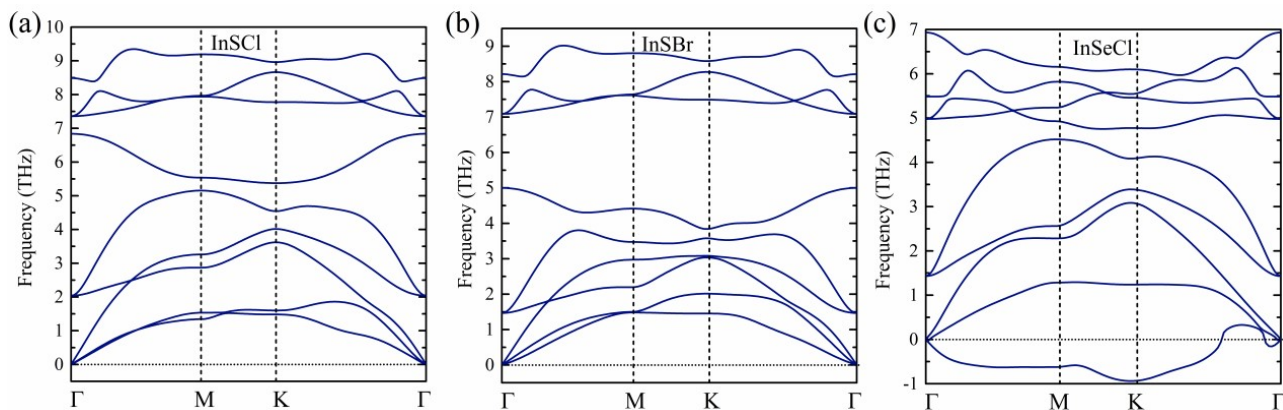

**Fig. S1.** Phonon spectra of (a) InSCl, (b) InSBr, and (c) InSeCl monolayers.

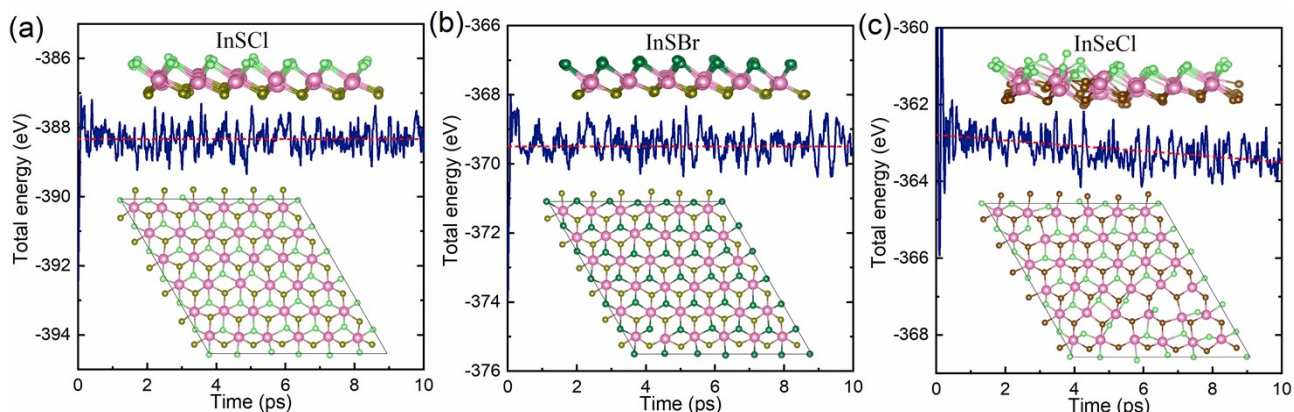

**Fig. S2.** Evolutions of atomic structures and potential energies of Janus (a) InSCl, (b) InSBr, and (c) InSeCl monolayers during the AIMD simulations at 300K for 10 ps. The red line indicates the average total energy during the simulations. For InSCl and InSBr monolayers, the initial equilibrium nanostructures are well maintained and the total energy has small fluctuation during the AIMD simulation at 300 K, suggesting that their good thermal stability. For InSeCl monolayer, the obvious

broken bonds and reduction of total energy indicate that it is thermally unstable.

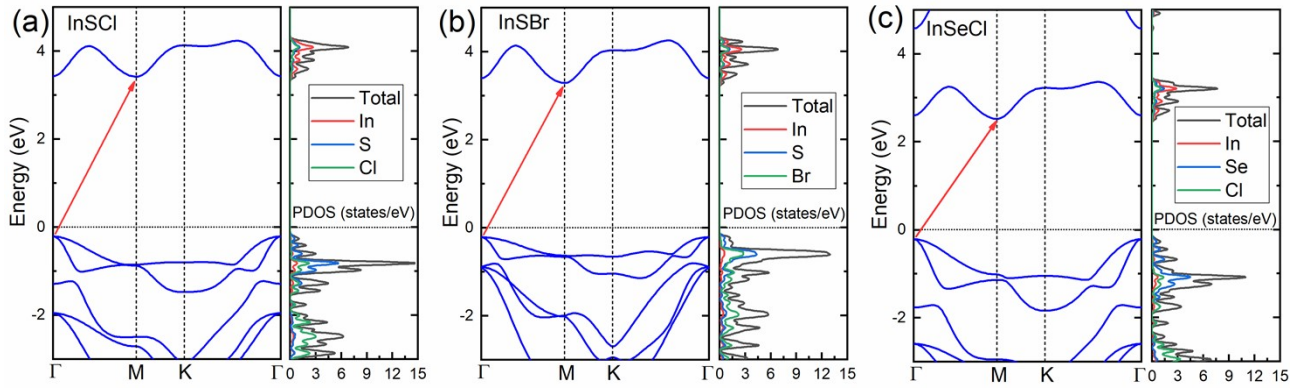

**Fig. S3.** Electronic band structures and partial density of states (PDOS) of Janus (a) InSCl, (b) InSBr, and (c) InSeCl monolayers calculated by HSE06 functional. The red arrow indicates the positions of the VBM and CBM, and the Fermi level is set at zero.

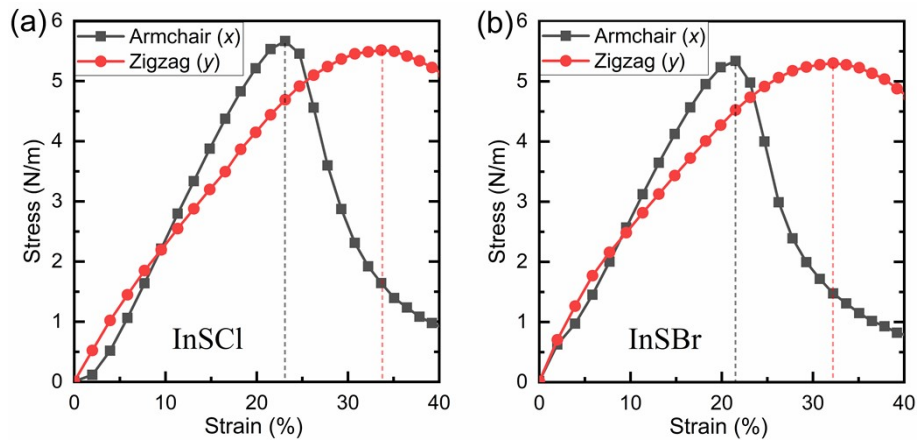

**Fig. S4.** The calculated stress-strain relations of Janus (a) InSCl and (b) InSBr monolayers under tensile deformation along armchair ( $x$ -) and zigzag ( $y$ -) directions.

**Table S2.** The comparison of piezoelectric strain coefficients between InSeBr-type monolayers and other reported 2D monolayers and 3D perovskite-based materials.

| Material                                                                                                                  | Piezoelectric strain coefficient |
|---------------------------------------------------------------------------------------------------------------------------|----------------------------------|
| 2D monolayer systems: $d_{11}$ (pm/V)                                                                                     |                                  |
| InSbCl                                                                                                                    | 149~154                          |
| InSBr                                                                                                                     | 51~53                            |
| InSeBr                                                                                                                    | 2361~3224                        |
| SnSe                                                                                                                      | 251                              |
| SbAs                                                                                                                      | 243                              |
| BiInTe <sub>3</sub>                                                                                                       | 362                              |
| MoS <sub>2</sub>                                                                                                          | 3.73                             |
| Janus GaInS <sub>2</sub>                                                                                                  | 8.33                             |
| Janus SbTeI                                                                                                               | 12.95                            |
| 3D perovskite-based systems: $d_{33}$ (pm/V)                                                                              |                                  |
| Pb(Zr, Ti)O <sub>3</sub> (PZT)                                                                                            | 360~900                          |
| PbTiO <sub>3</sub> (PT)                                                                                                   | 1000~2000                        |
| K <sub>0.5</sub> Na <sub>0.5</sub> NbO <sub>3</sub> (KNN)                                                                 | 355~1030                         |
| Bi <sub>0.5</sub> Na <sub>0.5</sub> TiO <sub>3</sub> -Bi <sub>0.5</sub> K <sub>0.5</sub> TiO <sub>3</sub> (BNKT)          | 250~1400                         |
| Bi <sub>0.5</sub> Na <sub>0.5</sub> TiO <sub>3</sub> (BNT)                                                                | 249~1100                         |
| Ba(Zr <sub>0.2</sub> Ti <sub>0.8</sub> )O <sub>3-x</sub> (Ba <sub>0.7</sub> Ca <sub>0.3</sub> )TiO <sub>3</sub> (BZT-BCT) | 400~1310                         |
| (Ba <sub>0.94</sub> Ca <sub>0.06</sub> )-(Ti <sub>0.95</sub> Zr <sub>0.05</sub> )O <sub>3</sub> (BCTZ)                    | 2027                             |

**Table S3.** The in-plane elastic stiffness coefficients  $C_{11}$  and  $C_{12}$  of the 2D Janus InSeBr-type monolayers. The superscripts of *el* and *ion* represent electronic and ionic contributions, respectively.  $C_{11} = C_{11}^{el} + C_{11}^{ion}$  and  $C_{12} = C_{12}^{el} + C_{12}^{ion}$ .

| Material | $C_{11}^{el}$ | $C_{12}^{el}$ | $C_{11}^{ion}$ | $C_{12}^{ion}$ | $C_{11}$ | $C_{12}$ |
|----------|---------------|---------------|----------------|----------------|----------|----------|
| InSbCl   | 62.20         | 25.57         | -27.98         | 1.98           | 34.22    | 27.55    |
| InSBr    | 60.57         | 24.32         | -21.24         | -1.11          | 39.33    | 23.21    |
| InSeCl   | 53.78         | 21.89         | -40.42         | 17.94          | 13.36    | 39.83    |
| InSeBr   | 52.65         | 20.78         | -25.71         | 5.75           | 26.94    | 26.53    |

## References

1. S. Grimme, *J. Comput. Chem.*, 2006, **27**, 1787-1799.
2. S. Grimme, J. Antony, S. Ehrlich and H. Krieg, *J. Chem. Phys.*, 2010, **132**, 154104.
3. S. Grimme, S. Ehrlich and L. Goerigk, *J. Comput. Chem.*, 2011, **32**, 1456-1465.
4. A. Tkatchenko and M. Scheffler, *Phys. Rev. Lett.*, 2009, **102**, 073005.
5. H. Hahn and W. Nickels, *Z. Anorg. Allg. Chem.*, 1962, **314**, 307.

6. R. Kniep and W. Welzel, *Zeitschrift für Naturforschung B*, 1985, **40**, 26-31.
